# Supplementary material for: The Feeding Behaviour of Gall Midge Larvae and Its Implications for Biocontrol of the Giant Reed: Insights from Stable Isotope Analysis
Source: MDPI journal article supplement (doi:10.3390/biology11121805), 2022-12-12
Supplement: s1 [file s1]

# The feeding behaviour of gall midge larvae and its implications for biocontrol of the giant reed: insights from stable isotope analysis

Giulio Careddu<sup>1,2</sup>, Marcovalerio Botti<sup>1,3</sup>, Massimo Cristofaro<sup>3</sup>, Simona Sporta Caputi<sup>1,2,\*</sup>, Edoardo Calizza<sup>1,2</sup>, Loreto Rossi<sup>1,2</sup> and Maria Letizia Costantini<sup>1</sup>

<sup>1</sup> Department of Environmental Biology, Sapienza University of Rome, 00185, Rome, Italy  
<sup>2</sup> CoNISMa, National Inter-University Consortium for Marine Sciences, 00196, Rome, Italy  
<sup>3</sup> Biotechnology and Biological Control Agency (BBCA), 00123, Rome, Italy  
\* Correspondence: [simona.sportacaputi@uniroma1.it](mailto:simona.sportacaputi@uniroma1.it)

## Supplementary material

**Table S1.** Sampling sites. For each site geographical coordinates and description of the area are reported.

| Site | Latitude (N) | Longitude (E) | Site description                                                                                        |
|------|--------------|---------------|---------------------------------------------------------------------------------------------------------|
| A    | 41°59'3"     | 12°5'25"      | Next to a canal surrounded by trees that shade the site and protect it from the wind in town Cerveteri. |
| B    | 42°1'35"     | 12°15'53"     | On the edge of a busy road, covered by a few pine trees, in the small village of Osteria Nuova.         |
| C    | 41°40'44"    | 12°44'19"     | Near a drainage channel in town of Velletri.                                                            |
| D    | 42°0'57"     | 12°22'23"     | Grassy area surrounded by urban buildings in La Storta, a district in the northern part of Rome         |
| E    | 42°8'53"     | 12°16'22"     | On a dirt road with little traffic and vegetation, in Trevignano Romano, near Lake Bracciano.           |
| F    | 41°33'0"     | 12°43'46"     | Near an agricultural drainage channel next to a busy tree-lined road of village of Campo Verde.         |

**Table S2.** C and N isotopic signatures of *L. donacis* with and without parasites in four sampling sites. The t-test refers to the comparison between parasitized and non-parasitized larvae in the same site.

| Site | Larvae with parasites     |                           |             | Larvae without parasites  |                           |             | t-test                |                       |
|------|---------------------------|---------------------------|-------------|---------------------------|---------------------------|-------------|-----------------------|-----------------------|
|      | $\delta^{15}\text{N}$ (‰) | $\delta^{13}\text{C}$ (‰) | Sample size | $\delta^{15}\text{N}$ (‰) | $\delta^{13}\text{C}$ (‰) | Sample size | $\delta^{15}\text{N}$ | $\delta^{13}\text{C}$ |
|      | Mean $\pm$ S.D.           | Mean $\pm$ S.D.           | N°          | Mean $\pm$ S.D.           | Mean $\pm$ S.D.           | N°          |                       |                       |
| A    | 6.5 $\pm$ 0.7             | -27.7 $\pm$ 1.0           | 13          | 6.0 $\pm$ 0.8             | -27.2 $\pm$ 0.9           | 14          | n.s.                  | n.s.                  |
| B    | 5.5 $\pm$ 1.2             | -27.5 $\pm$ 2.1           | 13          | 5.5 $\pm$ 1.8             | -28.0 $\pm$ 0.9           | 13          | n.s.                  | n.s.                  |
| D    | 5.5 $\pm$ 3.5             | -28.9 $\pm$ 0.8           | 12          | 5.7 $\pm$ 3.8             | -29.1 $\pm$ 0.7           | 12          | n.s.                  | n.s.                  |
| E    | 4.2 $\pm$ 0.7             | -25.8 $\pm$ 1.2           | 12          | 5.0 $\pm$ 0.9             | -25.4 $\pm$ 0.7           | 12          | <b>p &lt; 0.05</b>    | n.s.                  |
